# Supplementary material
Source: PubMed Central journal article supplement (PMC3143664)
Supplement: supp_M111.244533_jbc.M111.244533-1.pdf [file supp_M111.244533_jbc.M111.244533-1.pdf]

### Supplementary data

**Figure S1:** Molecular mass determination of YeSlc26A2 calculated from the distribution coefficient  $K_{av}$  and the calibration curve obtained from standard proteins (See Fig. 2D).  $K_{av}$  were calculated from the equation  $K_{av} = (V_e - V_0) / (V_t - V_0)$  where  $V_e$  is the elution volume of each protein,  $V_0$  column void volume and  $V_t$  total bed volume.

**Figure S2:** Trypsin proteolysis/Mass spectrometry analysis of *Yersinia enterocolotica* Slc26A2. YeSlc26A2 was purified to homogeneity and separated from trace impurities by SDS-PAGE, the resulting band was digested with trypsin overnight and the resulting peptides detected by mass spectrometry (nLC-MS-MS on an LTQ Orbitrap Velos). The *Yersinia enterocolotica* Slc26A2 amino acid sequence is aligned to that of the *Synechococcus* Slc26 protein BicA using Clustal W, "\*", ":", and "." under sequences mark positions of complete sequence conservation, conserved substitutions and semi-conserved substitutions respectively. The YeSlc26A2 peptides detected are defined by green bars with the trypsin cleavage sites indicated by red arrowheads. BicA (Shelden, M. C., Howitt, S. M., and Price, G. D. (2010) *Mol Membr Biol* 27, 12-23) transmembrane  $\alpha$ -helices are highlighted in cyan. All the sites at which trypsin cleaves YeSlc26A2 are within predicted exposed loops or the soluble STAS domain, suggesting the detergent micelle protects the transmembrane region from trypsinolysis.

**Figure S3:** Amino acid sequence alignment of *Yersinia enterocolotica* Slc26A2 and *Mus musculus* SLC26A6 generated using Clustal W. The glutamate residues in red have been proposed to be functionally essential. "\*", ":", and "." under sequences mark positions of complete sequence conservation, conserved substitutions and semi-conserved substitution respectively.

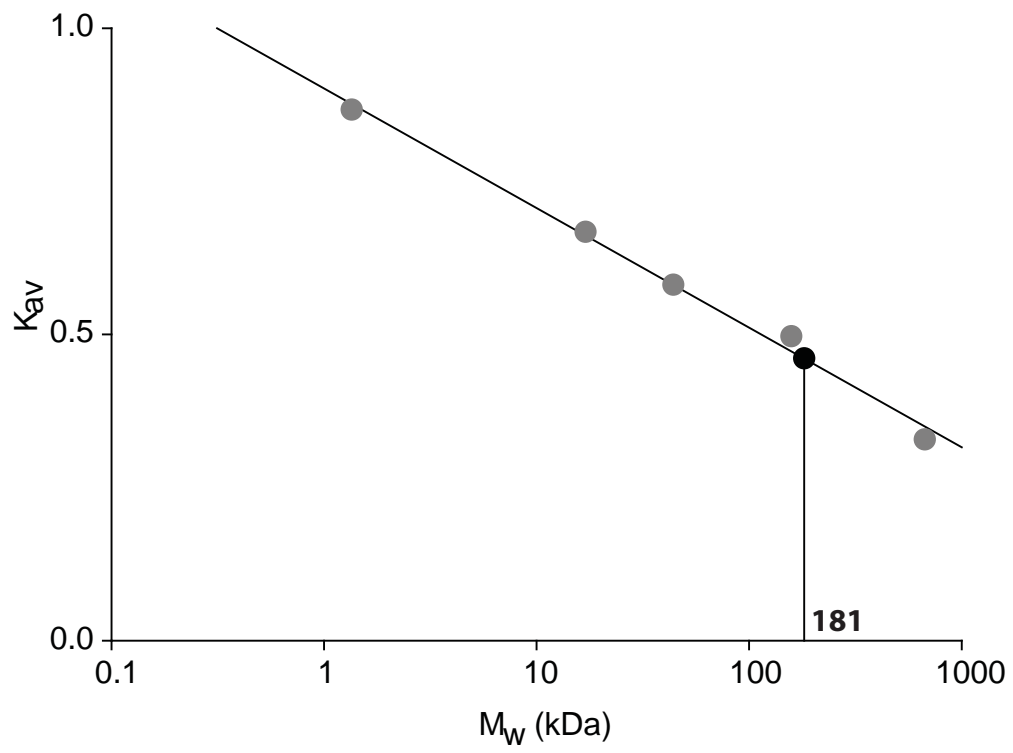

Figure S1



M.mSLC26A6 MELQRDRYHVERPLLNQEQLLEDLGHWGPAAKTHQWRTWFRCSRARAHSLLLQHVPVLGWL 60  
 YeSlc26A2 -----MW 2

M.mSLC26A6 PRYPVREWLLGDLLSGLSVAIMQLPQGLAYALLAGLPPMFGLYSSFYFPVFIYFLFGTSRH 120  
 YeSlc26A2 QVLKSPKLMTRECLAGVVTALALVPEVISFSVIAGVDPKVSLIASIVLCFTLSILGGRPA 62  
 : : : \*:\* : \* : \* : : : : \* : \* : \* : \*

M.mSLC26A6 ISVGTFAVMSVMVGSVTESLTADKAFVQGLNATADDARVQVAYTLSFLVGLFQVGLGLVH 180  
 YeSlc26A2 MVSAAAGSVALVIG-----PMVHAHGVEYILPAVILAGIVQIILFGLTG 105  
 : . : . : : : \* . . . \* : . : \* : \* : \* : \*

M.mSLC26A6 FGFVVTYLSEPLVRSYTTAASVQVLVSQKLVYVFGIKLSSHSGPLSVIYTVLEVCAQLPET 240  
 YeSlc26A2 LSRMMRYIIPRSVMIGFVNALGILIFFAQVPHIWG-----HSSLVWVMAVTLIIIVLLLP 160  
 : . : : \* : : : : : . : : \* : : : \* : \* : \* : \* : \*

M.mSLC26A6 VPGTVVTAIVAGVALVLVKKLLNEKLHRRPLPLPIGELLTLIGATGISYGVKLNDRFKVDV 300  
 YeSlc26A2 ILKSVPSPLIAIIVVTLVAIL---MGYRLPN-----VGDEGAMS----- 196  
 : : \* : : \* : : . \* \* : : \* \* : \* \*

M.mSLC26A6 VGNITTGLIPPVAPKTELFATLVGNFAIAIVVGFIAIASLKGIFALRHGYRVDNSQELVA 360  
 YeSlc26A2 -ADLPSFTQLLVPLNWQTFQIVWPTALSVAFVGLMESLLTAKLVDDITDTQSSKRRFSWG 255  
 . : : : \* : : \* : . : \* : \* : : : \* : . : . : \* .

M.mSLC26A6 LGLSNLIGGFFQCFPVSCMSRSLVQESTGGN-TQVAGAVSSLFILLIIVKLGELFRDLP 419  
 YeSlc26A2 LGVGNILAGFYGGIAGCAMILGQTIIVNVELGKARSRVSTVAAAVLLVLTGLSKLLAQIP 315  
 \* : . : \* : \* : : . . : : : \* : \* : \* : . : : : \* : \* : \* : \*

M.mSLC26A6 KAVLAAVIIVNLKGMKQFSDICSLWKAN--RVDLLIWLVTFFVATILLNLDIGLAVSIVF 477  
 YeSlc26A2 MVVLAGIMMVAVKTVNWHSLQPATLKRMPWSETLVMVLTVLVTWVTSNLALGVLGIV 375  
 . \* \* : : \* : : \* : \* : \* : \* : \* : \* : \* : \* : \* : \*

M.mSLC26A6 SLLLVVVRMQLPHY -491  
 YeSlc26A2 AMILFARRIAHVIY -389

Figure S3
